# Supplementary material for: Development of FRET Biosensor to Characterize CSK Subcellular Regulations
Source: Preprints.org preprint supplement (doi:10.20944/preprints202403.0636.v1), 2024-03-11
Supplement: Supplementary file 1 [file supplementary]

## **Supporting Information**

### **Development of FRET biosensor to characterize CSK subcellular regulations**

Mingxing Ouyang<sup>1†\*</sup>, Yujie Xing<sup>1,2†</sup>, Shumin Zhang<sup>1</sup>, Liting Li<sup>1,2</sup>, Yan Pan<sup>1</sup>, Linhong Deng<sup>1\*</sup>

<sup>1</sup>Institute of Biomedical Engineering and Health Sciences, School of Medical and Health Engineering, Changzhou University, Changzhou, 213164 China

<sup>2</sup>School of Pharmacy, Changzhou University, Changzhou, 213164 China

<sup>†</sup>M.O. and Y.X. are co-first authors.

\*Corresponding authors:

Dr. Mingxing Ouyang

Professor at Institute of Biomedical Engineering and Health Sciences,  
School of Medical and Health Engineering, Changzhou University  
1 Gehu Rd, Wujin District, Changzhou, 213164 China  
Email: [mxouyang@cczu.edu.cn](mailto:mxouyang@cczu.edu.cn)

Dr. Linhong Deng

Fellow of AIBME, Cheung Kung Distinguished Professor  
Founding Director Institute of Biomedical Engineering and Health Sciences,  
School of Medical and Health Engineering, Changzhou University  
1 Gehu Rd, Wujin District, Changzhou, Jiangsu Province 213164 China  
Email: [dlh@cczu.edu.cn](mailto:dlh@cczu.edu.cn)

#### **The list of supporting materials:**

1. Supporting experimental procedures
2. Supporting figures S1-S5
3. Supporting movie

## **Supporting Experimental Procedures**

### **Cell culture**

HeLa cells were cultured in high-glucose DMEM (Gibco) supplemented with 10% fetal bovine serum (FBS), 2 mM L-Glutamine, 100 I.U./ml penicillin and 100 µg/ml streptomycin, and maintained at 37°C in 5% CO<sub>2</sub> incubator.

### **Purification of the biosensor and molecular size with coomassie brilliant blue staining**

The recombinant biosensor proteins with an N-terminal 6xHis tag in pRSETb vector were expressed in E. Coli (BL21) by culturing with 0.4 mM IPTG (Isopropyl β-D-1-thiogalactopyranoside, Sigma) at 25°C for 16-24 hours, and purified by nickel chelation chromatography<sup>1</sup>.

The purified protein is subjected to 10% Sodium Dodecyl Sulfate Polyacrylamide Gel Electrophoresis (SDS-PAGE) to separate proteins based on their sizes. Following electrophoresis, the gel is washed with double-distilled water using agitation. Subsequently, the gel is immersed in a Coomassie Brilliant Blue staining solution and agitated for 30 minutes to facilitate binding of the dye with proteins. The gel is then incubated in the destaining solution (containing 50% ethanol and 10% acetic acid) through multiple lasting washes to remove unbound dye. The picture of the protein bands in the gel is recorded by digital camera.

## Supporting Figures

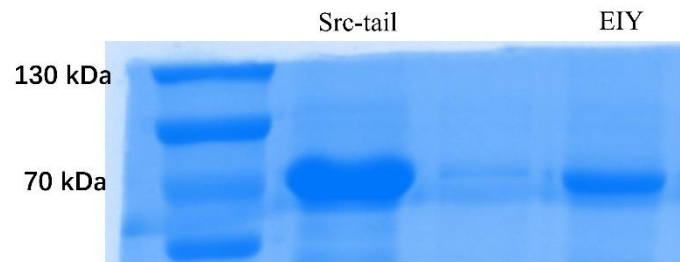

**Figure S1. Molecular size of the purified biosensor proteins.** The biosensor proteins were resolved on SDS-PAGE gel by electrophoresis and stained with Coomassie bright blue. The picture shows the successfully purified CSK biosensor proteins with Src-tail and EIY substrates, which displays a molecular size around 70 kDa.

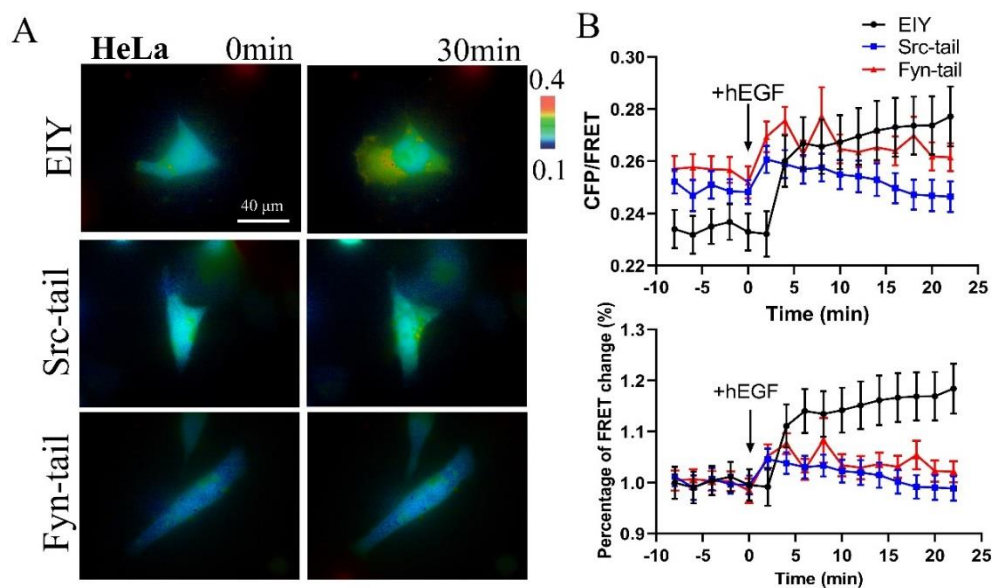

**Figure S2. Characterizations of CSK biosensor with different substrate peptides in HeLa and MEF cells.** (A) The ratiometric FRET images of HeLa cells expressing CSK biosensor with EIY, Src-tail or Fyn-tail substrate before and after EGF stimulation. (B) The quantified time courses of FRET ratio and normalized FRET changes from the cells in (A).

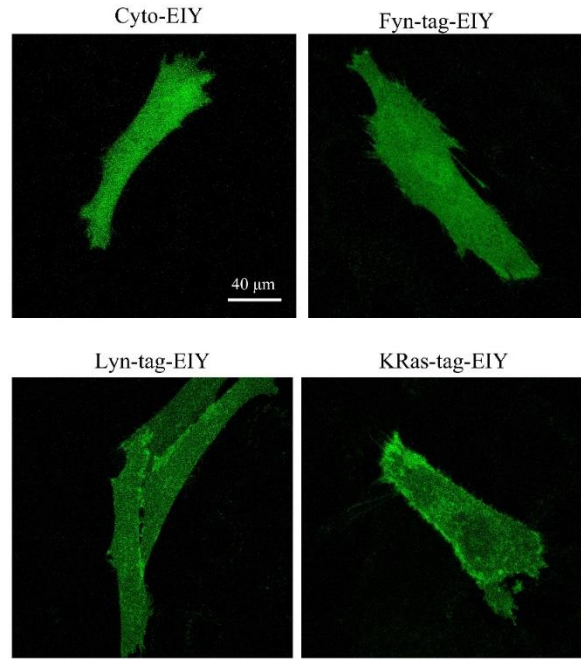

**Figure S3.** Confocal images of ASM cells show membrane localizations of CSK biosensor with or without membrane-targeting peptides. ASM cells were transfected with cytosolic or membrane microdomain-targeted CSK biosensors (Cyto, Fyn-tag, Lyn-tag, KRas-tag). After 24 h, cells were further seeded onto glass-bottom dishes overnight for confocal microscopic imaging.

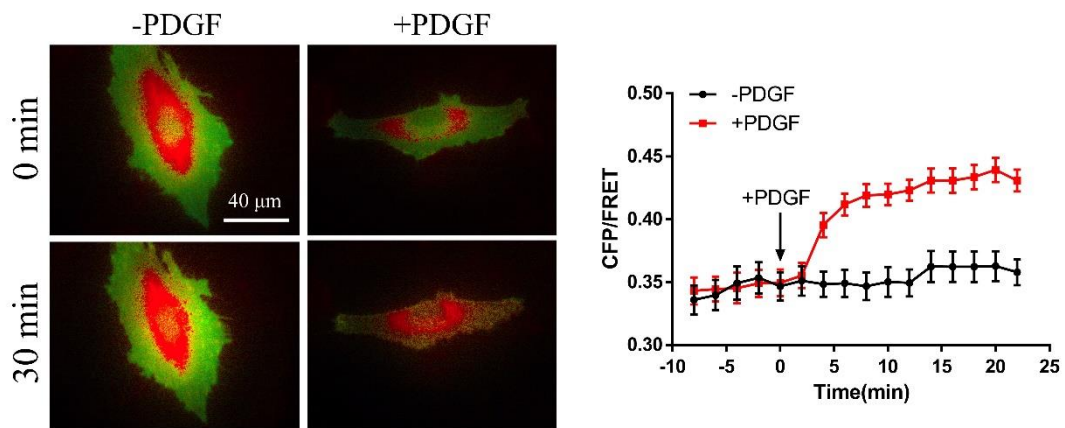

**Figure S4.** FRET change of CSK biosensor activated with PDGF. The KRas-tag-CSK FRET biosensor was transfected into ASM cells, followed by FRET imaging

without (control group) or with (experimental group) 10 µg/ml PDGF stimulation. The changes of FRET ratio were compared through the quantified time-courses with or without PDGF.

### **Supporting movie legend**

**Supporting Movie S1.** PDGF-induced FRET responses of cytosolic and different membrane microdomain-localized CSK biosensors in ASM cells.

### **Reference:**

1. Miyawaki, A.; Tsien, R. Y., Monitoring protein conformations and interactions by fluorescence resonance energy transfer between mutants of green fluorescent protein. *Methods in enzymology* **2000**, 327, 472-500.
