# Supplementary material for: Development of FRET Biosensor to Characterize CSK Subcellular Regulations
Source: Preprints.org preprint supplement (doi:10.20944/preprints202403.0636.v1), 2024-03-11
Supplement: Supplementary file 2 [file supplementary]

Archive with 5 entries (5 files):
- Supplementary materials/Movie S1.avi
- Supplementary materials/Movie S2.avi
- Supplementary materials/Movie S3.avi
- Supplementary materials/Movie S4.avi
- Supplementary materials/Supporting_2024.02.25.pdf
